# Supplementary material for: Novel Insights into Conformational Rearrangements of the Bacterial Flagellar Switch Complex
Source: PubMed Central journal article supplement (PMC6445934; doi:10.1128/mbio.00079-19), 2019-04-02

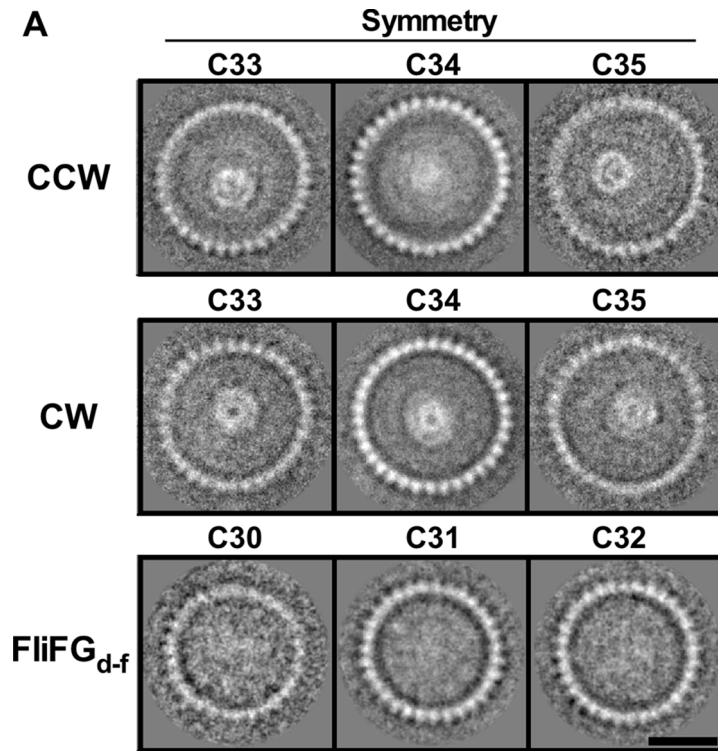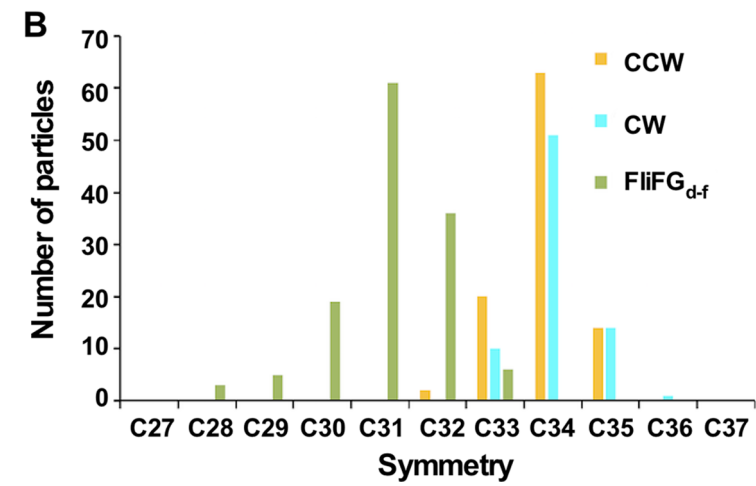

Supplement: mBio.00079-19-sf004.pdf [file mBio.00079-19-sf004.pdf]
