# Supplementary material for: Novel Insights into Conformational Rearrangements of the Bacterial Flagellar Switch Complex
Source: PubMed Central journal article supplement (PMC6445934; doi:10.1128/mbio.00079-19), 2019-04-02
Supplement: mBio.00079-19-st001.pdf [file mBio.00079-19-st001.pdf]

**Table S1. Rotational speed and torque of the flagellar motor.**

| Strain                              | Bead size ( $\mu\text{m}$ ) | 1.5             | 1.0             | 0.8             | 0.6             | 0.5           |
|-------------------------------------|-----------------------------|-----------------|-----------------|-----------------|-----------------|---------------|
| wild-type                           | Speed (Hz)                  | $26 \pm 4$      | $71 \pm 10$     | $110 \pm 20$    | $145 \pm 28$    | $174 \pm 35$  |
|                                     | Torque (pN nm)              | $1,989 \pm 271$ | $1,855 \pm 260$ | $1,533 \pm 243$ | $1,184 \pm 178$ | $854 \pm 166$ |
|                                     | Number of motors            | 54              | 39              | 49              | 23              | 46            |
| FliFG <sub>d-f</sub>                | Speed (Hz)                  | $20 \pm 4$      | $54 \pm 8$      | $91 \pm 15$     | $109 \pm 18$    | $120 \pm 20$  |
|                                     | Torque (pN nm)              | $1,473 \pm 260$ | $1,408 \pm 223$ | $1,306 \pm 217$ | $892 \pm 123$   | $596 \pm 84$  |
|                                     | Number of motors            | 33              | 33              | 54              | 24              | 44            |
| FliFG <sub>d-f</sub><br>FliG(D124Y) | Speed (Hz)                  | $18 \pm 5$      | $56 \pm 11$     | $88.8 \pm 13.9$ | $115 \pm 19$    | $135 \pm 25$  |
|                                     | Torque (pN nm)              | $1,425 \pm 225$ | $1,455 \pm 224$ | $1,194 \pm 177$ | $912 \pm 151$   | $616 \pm 126$ |
|                                     | Number of motors            | 15              | 11              | 24              | 24              | 25            |
| FliFG <sub>d-f</sub><br>FliM(F188L) | Speed (Hz)                  | $18 \pm 5$      | $52 \pm 8$      | $89 \pm 20$     | $123 \pm 24$    | $159 \pm 30$  |
|                                     | Torque (pN nm)              | $1,377 \pm 262$ | $1,338 \pm 197$ | $1,220 \pm 258$ | $963 \pm 153$   | $709 \pm 135$ |
|                                     | Number of motors            | 14              | 11              | 16              | 26              | 26            |
