# Supplementary material for: Novel Insights into Conformational Rearrangements of the Bacterial Flagellar Switch Complex
Source: PubMed Central journal article supplement (PMC6445934; doi:10.1128/mbio.00079-19), 2019-04-02
Supplement: mBio.00079-19-st002.pdf [file mBio.00079-19-st002.pdf]

**Table S2. Speed fluctuations of the flagellar motor.**

| Strain<br>(Number of<br>motors)                 |                               | Average $\pm$ SD |
|-------------------------------------------------|-------------------------------|------------------|
| wild-type<br>(n = 20)                           | $\omega_{av}$ (Hz)            | 49.0 $\pm$ 8.2   |
|                                                 | $\sigma_{\omega}$             | 7.6 $\pm$ 2.9    |
|                                                 | $\sigma_{\omega}/\omega_{av}$ | 0.16 $\pm$ 0.04  |
| FliFG <sub>d-f</sub><br>(n = 20)                | $\omega_{av}$ (Hz)            | 39.9 $\pm$ 8.6   |
|                                                 | $\sigma_{\omega}$             | 12.3 $\pm$ 3.7   |
|                                                 | $\sigma_{\omega}/\omega_{av}$ | 0.31 $\pm$ 0.12  |
| FliFG <sub>d-f</sub><br>FliG(D124Y)<br>(n = 20) | $\omega_{av}$ (Hz)            | 40.1 $\pm$ 7.1   |
|                                                 | $\sigma_{\omega}$             | 9.4 $\pm$ 3.0    |
|                                                 | $\sigma_{\omega}/\omega_{av}$ | 0.23 $\pm$ 0.07  |
| FliFG <sub>d-f</sub><br>FliM(F188L)<br>(n = 20) | $\omega_{av}$ (Hz)            | 40.2 $\pm$ 6.4   |
|                                                 | $\sigma_{\omega}$             | 6.9 $\pm$ 2.1    |
|                                                 | $\sigma_{\omega}/\omega_{av}$ | 0.17 $\pm$ 0.05  |

The values of the average speeds ( $\omega_{av}$ ) and their standard deviations ( $\sigma_{\omega}$ ) were obtained by tracking the position of 1.0  $\mu\text{m}$  bead for 300 seconds. Note: their average motor speeds are slower than those presented in Table S1. Such speed reductions presumably result from a decrease in the energy level of bacterial cells because of much longer-term light illumination.
